# Supplementary material for: Chelate electronic properties control the redox behaviour and superoxide reactivity of seven-coordinate manganese(II) complexes
Source: Royal Society of Chemistry journal article supplement (doi:10.1039/b906100m), 2009-01-01
Supplement: b906100m.pdf [file b906100m.pdf]

# Chelate Electronic Properties control the Redox Behaviour and Superoxide Reactivity of Seven-Coordinate Manganese(II) Complexes

*Gao-Feng Liu, Katharina Dürr, Ralph Puchta, Frank W. Heinemann, Rudi van Eldik, Ivana Ivanović-Burmazović\**

## **X-ray crystal structure determinations of 1, 2 and H<sub>2</sub>Dcphp:**

Suitable single crystals were coated with protective perfluoropolyalkylether oil and mounted in the cold nitrogen gas stream of a Bruker-Nonius KappaCCD diffractometer. Data were collected at 100 K using MoK $\alpha$  radiation (graphite monochromator). Diffraction intensities were corrected for Lorentz and polarization effects. A semi-empirical absorption correction based on multiple measurements of reflections was applied for **1** ( $T_{\min} = 0.918$ ,  $T_{\max} = 0.993$ ),<sup>1</sup> while a numerical absorption correction based on the description of crystal faces was applied for **2** ( $T_{\min} = 0.826$ ,  $T_{\max} = 0.902$ ) and **H<sub>2</sub>Dcphp** ( $T_{\min} = 0.982$ ,  $T_{\max} = 0.990$ ).<sup>2</sup> The structures were solved by direct methods and refined by full-matrix least-squares procedures on  $F^2$ .<sup>3</sup> All non-hydrogen atoms were refined with anisotropic displacement parameters. With the exception of the hydrogen atoms of the two methanol solvent molecules of **1**, which were placed in calculated positions of optimized geometry, the positions of all other hydrogen atoms were derived from difference fourier maps. The positional parameters of the H atoms in **1** and **2** were refined while those of **H<sub>2</sub>Dcphp** were kept

in their originally derived positions. The isotropic displacement parameters of all hydrogen atoms were tied to those of their adjacent carrier atoms by a factor of 1.2 or 1.5. The solvent water molecule in the crystal structure of **H<sub>2</sub>Dcphp** is disordered. Two alternative sites have been identified that are occupied by approximately 87% (O3) and 13% (O3A).

CCDC 720837 - 720839 contain the supplementary crystallographic data for this paper. These data can be obtained free of charge from The Cambridge Crystallographic Data Centre via [www.ccdc.cam.ac.uk/data\\_request/cif](http://www.ccdc.cam.ac.uk/data_request/cif)

- <sup>1</sup> *SADABS*, 2.10, Bruker AXS, Inc., 2002, Madison, WI, USA.
- <sup>2</sup> P. Coppens (1970). In *Crystallographic Computing*, edited by F.R. Ahmed, S.R.Hall & C.P.Huber, pp 255-270. Copenhagen: Munksgaard.
- <sup>3</sup> *SHELXTL* NT 6.12, Bruker AXS, Inc., 2002, Madison, WI, USA.

**Table S1** Crystallographic data, data collection and refinement details of the X-ray crystal structure determinations of **1**, **2** and **H<sub>2</sub>Dcphp**.

|                                                              | <b>1</b>                                                        | <b>2</b>                                                                         | <b>H<sub>2</sub>Dcphp</b>                                        |
|--------------------------------------------------------------|-----------------------------------------------------------------|----------------------------------------------------------------------------------|------------------------------------------------------------------|
|                                                              | <b>CCDC-720837</b>                                              | <b>CCDC-720838</b>                                                               | <b>CCDC-720839</b>                                               |
| Molecular formula                                            | C <sub>21</sub> H <sub>29</sub> MnN <sub>7</sub> O <sub>6</sub> | C <sub>19</sub> H <sub>23</sub> Cl <sub>2</sub> MnN <sub>7</sub> O <sub>10</sub> | C <sub>17</sub> H <sub>17</sub> N <sub>7</sub> O <sub>3</sub>    |
| <i>M<sub>r</sub></i>                                         | 530.45                                                          | 635.28                                                                           | 367.38                                                           |
| Temperature [K]                                              | 100(2)                                                          | 100(2)                                                                           | 100(2)                                                           |
| Wavelength [Å]                                               | 0.71073                                                         | 0.71073                                                                          | 0.71073                                                          |
| Crystal description                                          | yellow needle                                                   | orange prism                                                                     | colourless block                                                 |
| Crystal size [mm]                                            | 0.25 × 0.10 × 0.07                                              | 0.28 × 0.24 × 0.17                                                               | 0.23 × 0.18 × 0.12                                               |
| Crystal system                                               | monoclinic                                                      | monoclinic                                                                       | monoclinic                                                       |
| Space group                                                  | <i>C2/c</i> (No. 15)                                            | <i>C2/c</i> (No. 15)                                                             | <i>P2<sub>1</sub>/n</i> (No. 14)                                 |
| <i>a</i> [Å]                                                 | 25.251(2)                                                       | 10.9947(6)                                                                       | 11.9352(9)                                                       |
| <i>b</i> [Å]                                                 | 7.6250(5)                                                       | 31.380(4)                                                                        | 8.3106(3)                                                        |
| <i>c</i> [Å]                                                 | 27.574(2)                                                       | 7.9492(6)                                                                        | 17.982(2)                                                        |
| $\beta$ [°]                                                  | 113.044(5)                                                      | 108.613(5)                                                                       | 102.780(7)                                                       |
| <i>V</i> [Å <sup>3</sup> ]                                   | 4885.4(6)                                                       | 2599.1(4)                                                                        | 1739.4(2)                                                        |
| <i>Z</i>                                                     | 8                                                               | 4                                                                                | 4                                                                |
| <i>F</i> (000)                                               | 2216                                                            | 1300                                                                             | 768                                                              |
| $\rho_{\text{calc}}$ [g cm <sup>-3</sup> ]                   | 1.442                                                           | 1.623                                                                            | 1.403                                                            |
| $\mu$ [mm <sup>-1</sup> ]                                    | 0.591                                                           | 0.780                                                                            | 0.101                                                            |
| Total reflections                                            | 55979                                                           | 31490                                                                            | 26980                                                            |
| Unique reflections                                           | 5386                                                            | 3105                                                                             | 3843                                                             |
| Observed refl. [ <i>I</i> > 2 $\sigma$ ( <i>I</i> )]         | 4235                                                            | 2482                                                                             | 2853                                                             |
| <i>R</i> (int)                                               | 0.0550                                                          | 0.0653                                                                           | 0.0832                                                           |
| Scan range $\theta$ [°]                                      | 3.21 to 27.10                                                   | 3.40 to 27.87                                                                    | 3.50 to 27.10                                                    |
| Completeness to $\theta_{\text{max}}$ [%]                    | 99.8                                                            | 99.7                                                                             | 99.8                                                             |
| Index ranges                                                 | -32 ≤ <i>h</i> ≤ 32<br>-9 ≤ <i>k</i> ≤ 9<br>-35 ≤ <i>l</i> ≤ 35 | -14 ≤ <i>h</i> ≤ 14<br>-41 ≤ <i>k</i> ≤ 41<br>-10 ≤ <i>l</i> ≤ 10                | -15 ≤ <i>h</i> ≤ 15<br>-10 ≤ <i>k</i> ≤ 9<br>-22 ≤ <i>l</i> ≤ 23 |
| Data / restraints / parameters                               | 5386 / 0 / 383                                                  | 3105 / 0 / 212                                                                   | 3843 / 0 / 253                                                   |
| Goodness-of-fit on <i>F</i> <sup>2</sup>                     | 1.129                                                           | 1.052                                                                            | 1.030                                                            |
| <i>RI</i> , <i>wR2</i> [ <i>I</i> > 2 $\sigma$ ( <i>I</i> )] | 0.0396, 0.0827                                                  | 0.0331, 0.0701                                                                   | 0.0463, 0.0949                                                   |
| <i>RI</i> , <sup>1</sup> <i>wR2</i> (all data)               | 0.0602, 0.0882                                                  | 0.0538, 0.0754                                                                   | 0.0756, 0.1051                                                   |
| Max./min. el. density [e.Å <sup>-3</sup> ]                   | +0.344, -0.311                                                  | +0.423, -0.609                                                                   | +0.318, -0.256                                                   |

**Table S2** Selected bond distances (Å) and bond angles (°) of **1** and **2**.

| Bond distances (Å)                     |           |                                        |           |
|----------------------------------------|-----------|----------------------------------------|-----------|
| <b>1</b>                               |           |                                        |           |
| Mn1-O4                                 | 2.194(2)  | N2-C6                                  | 1.310(3)  |
| Mn1-N5                                 | 2.265(2)  | N2-N3                                  | 1.384(2)  |
| Mn1-N2                                 | 2.269(2)  | N5-C12                                 | 1.308(3)  |
| Mn1-O3                                 | 2.282(2)  | N5-N6                                  | 1.390(2)  |
| Mn1-N1                                 | 2.332(2)  | O1-C6                                  | 1.290(2)  |
| Mn1-N7                                 | 2.360(2)  | O2-C12                                 | 1.280(2)  |
| Mn1-N4                                 | 2.467(2)  |                                        |           |
| <b>2</b>                               |           |                                        |           |
| Mn1-O1a <sup>#</sup>                   | 2.216(2)  | Mn1-N4                                 | 2.330(2)  |
| Mn1-O1                                 | 2.216(2)  | Mn1-N4a <sup>#</sup>                   | 2.330(2)  |
| Mn1-N1                                 | 2.313(2)  | N2-C6                                  | 1.293(2)  |
| Mn1-N2a <sup>#</sup>                   | 2.328(2)  | N2-N3                                  | 1.356(2)  |
| Mn1-N2                                 | 2.328(2)  |                                        |           |
| Bond angles (deg)                      |           |                                        |           |
| <b>1</b>                               |           |                                        |           |
| O4-Mn1-O3                              | 177.62(6) | N5-Mn1-N7                              | 69.20(6)  |
| O4-Mn1-N5                              | 86.08(6)  | N2-Mn1-N7                              | 152.37(6) |
| O4-Mn1-N2                              | 100.07(6) | O3-Mn1-N7                              | 83.67(6)  |
| N5-Mn1-N2                              | 134.93(6) | N1-Mn1-N7                              | 135.26(6) |
| N5-Mn1-O3                              | 94.12(6)  | O4-Mn1-N4                              | 83.04(6)  |
| N2-Mn1-O3                              | 81.47(6)  | N5-Mn1-N4                              | 156.51(6) |
| O4-Mn1-N1                              | 94.11(6)  | N2-Mn1-N4                              | 67.77(6)  |
| N5-Mn1-N1                              | 67.64(6)  | O3-Mn1-N4                              | 95.93(6)  |
| N2-Mn1-N1                              | 67.41(6)  | N1-Mn1-N4                              | 133.78(6) |
| O3-Mn1-N1                              | 88.15(6)  | N7-Mn1-N4                              | 90.87(6)  |
| O4-Mn1-N7                              | 94.20(6)  |                                        |           |
| <b>2</b>                               |           |                                        |           |
| O1a <sup>#</sup> -Mn1-O1               | 169.95(8) | O1-Mn1-N4                              | 80.76(5)  |
| O1a <sup>#</sup> -Mn1-N1               | 95.02(4)  | N1-Mn1-N4                              | 134.07(4) |
| O1-Mn1-N1                              | 95.02(4)  | N2a <sup>#</sup> -Mn1-N4               | 154.10(5) |
| O1a <sup>#</sup> -Mn1-N2a <sup>#</sup> | 100.64(5) | N2-Mn1-N4                              | 68.49(5)  |
| O1-Mn1-N2a <sup>#</sup>                | 83.25(5)  | O1a <sup>#</sup> -Mn1-N4a <sup>#</sup> | 80.76(5)  |
| N1-Mn1-N2                              | 67.47(4)  | O1-Mn1-N4a <sup>#</sup>                | 92.22(5)  |
| O1a <sup>#</sup> -Mn1-N2               | 83.25(5)  | N1-Mn1-N4a <sup>#</sup>                | 134.07(4) |
| O1-Mn1-N2                              | 100.64(5) | N2a <sup>#</sup> -Mn1-N4a <sup>#</sup> | 68.49(5)  |
| N1-Mn1-N2a <sup>#</sup>                | 67.47(4)  | N2-Mn1-N4a <sup>#</sup>                | 154.10(5) |
| N2a <sup>#</sup> -Mn1-N2               | 134.95(7) | N4-Mn1-N4a <sup>#</sup>                | 91.85(7)  |
| O1a <sup>#</sup> -Mn1-N4               | 92.22(5)  |                                        |           |

<sup>#</sup> symmetry transformation: -x+2, y, -z+0.5

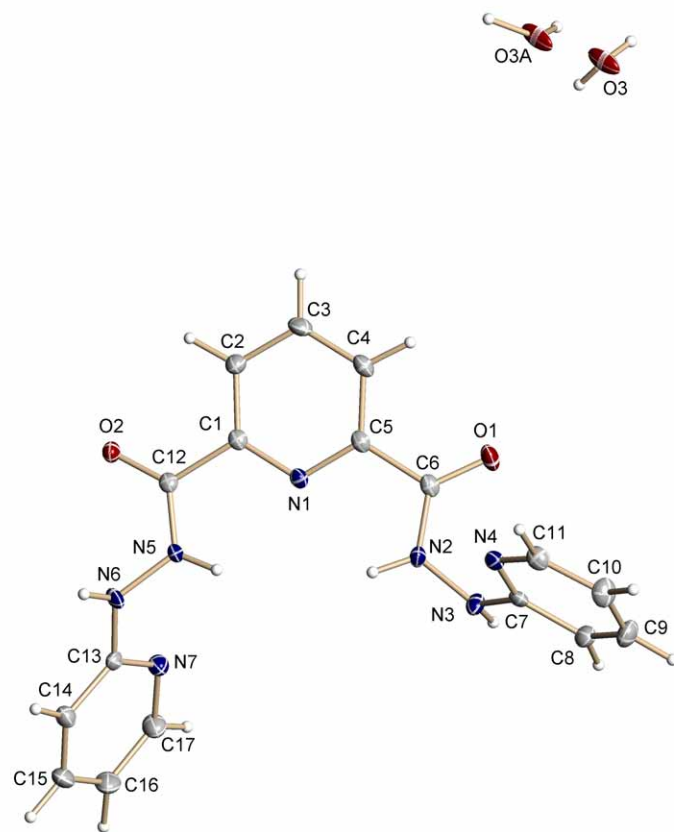

**Figure S1** Thermal ellipsoid plot of the molecular structure of **H<sub>2</sub>Dcphp** (50% probability).

**Table S3** Selected bond distances (Å) of **H<sub>2</sub>Dcphp**.

| Bond distances (Å) |          |        |          |
|--------------------|----------|--------|----------|
| O1-C6              | 1.226(2) | N5-N6  | 1.388(2) |
| O2-C12             | 1.237(2) | N5-H5N | 0.89     |
| N2-C6              | 1.347(2) | N6-C13 | 1.372(2) |
| N2-N3              | 1.387(2) | N6-H6N | 0.89     |
| N2-H2N             | 0.91     | C5-C6  | 1.507(2) |
| N3-C7              | 1.369(2) | C1-C12 | 1.507(2) |
| N3-H3N             | 0.92     |        |          |

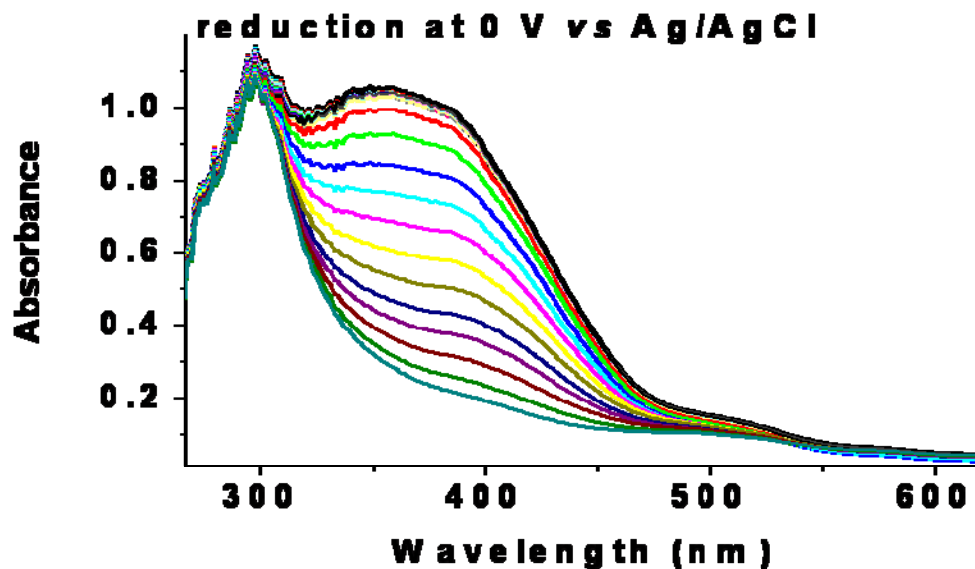

**Figure S2** Reduction of the Mn<sup>III</sup> species of **1** at 0 V vs Ag/AgCl.

#### Quantum Chemical Methods:

All structures have been preoptimized at the UHF/LANL2MB[A,B,C] level of theory and characterized as minima by computation of vibrational frequencies. We performed hybrid density functional structure optimizations using the B3LYP functional[B3LYP] and the LANL2DZ basis set with effective core potentials,[C,LANL2DZ] augmented with polarization functions on nonhydrogen atoms,[pol] further denoted as B3LYP/LANL2DZp. The influence of the bulk solvent was evaluated via single-point calculations using the CPCM [CPCM] formalism, that is, B3LYP(CPCM)/LANL2DZp//B3LYP/LANL2DZp and water as solvent. Corrections for zero-point vibrational energy (UHF/LANL2MB) were made, and all wave functions were tested for stability. The GAUSSIAN suite of programs was used.[G03]

[A] Hehre, W. J.; Stewart, R. F.; Pople, J. A. *J. Chem. Phys.* 1969, 51, 2657-2664.

[B] Collins, J. B.; von Rague' Schleyer, P.; Binkley, J. S.; Pople, J. A. *J. Chem. Phys.* 1976, 64, 5142-5151.

[C]

(a) Hay, P. J.; Wadt, W. R. *J. Chem. Phys.* 1985, 82, 270-283.

(b) Hay, P. J.; Wadt, W. R. *J. Chem. Phys.* 1985, 82, 284-298.

(c) Hay, P. J.; Wadt, W. R. *J. Chem. Phys.* 1985, 82, 299-310.

[B3LYP]

- (a) Becke, A. D. *J. Phys. Chem.* 1993, 97, 5648-5652.
- (b) Lee, C.; Yang, W.; Parr, R. G. *Phys. Rev. B.* 1988, 37, 785-789.
- (c) Stephens, P. J.; Devlin, F. J.; Chabalowski, C. F.; Frisch, M. J. *J. Phys. Chem.* 1994, 98, 11623-11627.

[LANL2DZ]

Dunning, T. H., Jr.; Hay, P. J. *Mod. Theor. Chem.* 1976, 3, 1-28.

[pol]

Huzinaga, S., Ed. *Gaussian Basis Sets for Molecular Calculations*; Elsevier: Amsterdam, The Netherlands, 1984.

[CPCM]

- (a) V. Barone, M. Cossi, *J. Phys. Chem. A* 1998, 102 1995 –2001.
- (b) M. Cossi, N. Rega, G. Scalmani, V. Barone, *J. Comp. Chem.* 2003, 24, 669– 681.

[G03]

M. J.Frisch, G.W. Trucks,H.B. Schlegel, G. E. Scuseria,M.A.Robb, J. R. Cheeseman, J. A. Montgomery, Jr., T. Vreven, K. N. Kudin, J. C. Burant, J. M. Millam, S. S. Iyengar, J. Tomasi, V. Barone, B. Mennucci, M. Cossi, G. Scalmani, N. Rega, G. A. Petersson, H.Nakatsuji,M.Hada,M. Ehara, K. Toyota,R.Fukuda, J. Hasegawa, M. Ishida, T. Nakajima, Y. Honda, O. Kitao, H. Nakai, M. Klene, X. Li, J. E. Knox,H. P.Hratchian, J. B. Cross, V. Bakken, C.Adamo, J. Jaramillo, R. Gomperts, R. E. Stratmann, O. Yazyev, A. J. Austin, R. Cammi, C. Pomelli, J. Ochterski, P. Y. Ayala, K. Morokuma, G. A. Voth, P. Salvador, J. J. Dannenberg, V. G. Zakrzewski, S. Dapprich, A. D. Daniels, M. C. Strain, O. Farkas, D. K. Malick, A. D. Rabuck, K. Raghavachari, J. B. Foresman, J. V. Ortiz, Q. Cui, A. G. Baboul, S. Clifford, J. Cioslowski, B. B. Stefanov, G. Liu, A. Liashenko, P. Piskorz, I. Komaromi, R. L. Martin, D. J. Fox, T. Keith, M. A. Al-Laham, C. Y. Peng, A. Nanayakkara, M. Challacombe, P. M. W. Gill, B. G. Johnson, W. Chen, M. W. Wong, C. Gonzalez and J. A. Pople, *GAUSSIAN 03* (Revision C.02), Gaussian, Inc., Wallingford, CT, 2004.

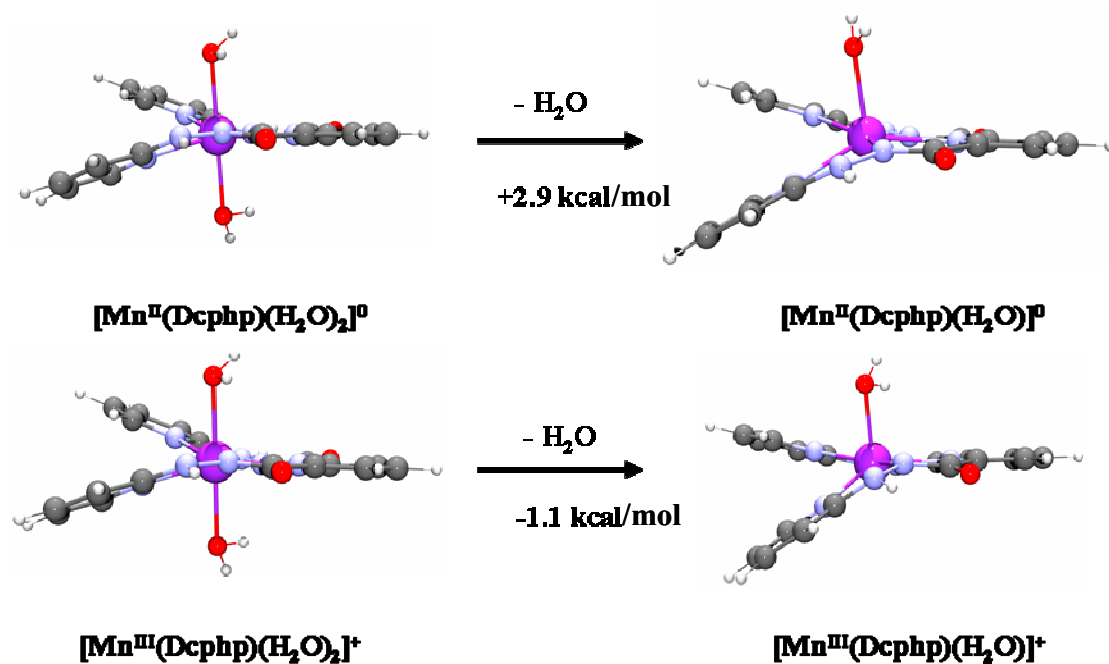

Figure S3 Calculated (B3LYP(CPCM)/LANL2DZp//B3LYP/LANL2DZp + ZPE (HF/LANL2MB)) water dissociation energy ( $\Delta E$ ) for  $[\text{Mn}^{\text{II}}(\text{Dcphp})(\text{H}_2\text{O})_2]^0$  and  $[\text{Mn}^{\text{III}}(\text{Dcphp})(\text{H}_2\text{O})_2]^+$ .

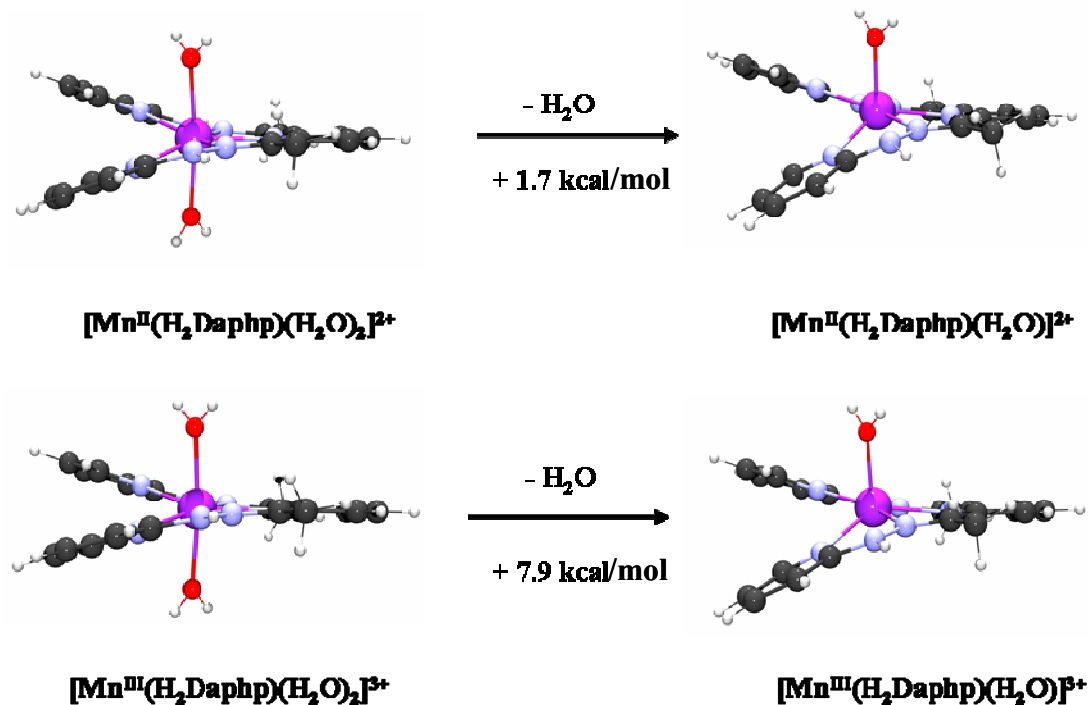

Figure S4 Calculated (B3LYP(CPCM)/LANL2DZp//B3LYP/LANL2DZp + ZPE (HF/LANL2MB)) water dissociation energy ( $\Delta E$ ) for  $[\text{Mn}^{\text{II}}(\text{H}_2\text{Daphp})(\text{H}_2\text{O})_2]^{2+}$  and  $[\text{Mn}^{\text{III}}(\text{H}_2\text{Daphp})(\text{H}_2\text{O})_2]^{3+}$ .
